# Supplementary material for: Peach Fruit Development: A Comparative Proteomic Study Between Endocarp and Mesocarp at Very Early Stages Underpins the Main Differential Biochemical Processes Between These Tissues
Source: Front Plant Sci. 2019 Jun 4;10:715. doi: 10.3389/fpls.2019.00715 (PMC6558166; doi:10.3389/fpls.2019.00715)
Supplement: Supplementary file 13 [file Table_4.XLSX]

## Sheet: AA profiling
Supplementary Table 4. Amino acid profiling of peach fruit endocarp and mesocarp during very early development (Stages E, S1 and S2). Amounts are expressed in µg per gram of fresh tissue. ND: not detected
	Endocarp						Mesocarp
Amino acid	E		S1		S2		E		S1		S2
	Media	SD	Media	SD	Media	SD	Media	SD	Media	SD	Media	SD
Asp	0.944124	0.490983	0.686007	0.404997	1.02022	0.0736961	1.45494	0.454368	0.439431	0.303403	0.825791	0.275041
Glu	2.86388	1.33356	1.82659	1.1859	0.870965	0.0956002	1.89439	0.607392	0.852555	0.458502	0.580061	0.194135
HidroxiPro	0.295304	0.129337	0.295482	0.17983	0.284186		0.325909	0.133097	0.561873	0.403058	0.369037	0.266122
Asn	5.10945	2.80245	6.4335	1.6957	36.8277	3.87437	17.942	7.19526	16.9066	3.89285	28.0969	10.1466
Ser	1.20178	0.529895	0.706105	0.494588	5.21484	5.40798	2.78419	0.812022	2.74951	0.538675	4.87416	0.727465
Gln	0.693433	0.334273	0.635674	ND	0.550536	0.476108	0.812547	0.470895	0.28866	0.0640314	0.496896	0.128817
Gly	0.387318	0.106737	0.389783	0.214607	0.186012	0.141376	0.573982	0.221171	0.100573	0.0225079	0.0836631	0.104274
His	0.95096	ND	ND	ND	0.238724	ND	ND	ND	0.0843127	ND	0.0727372	ND
Citr	0.236719	ND	ND	ND	ND	ND	0.775622	ND		ND	ND	ND
Arg	0.161596	0.0508416	0.178726	0.0803257	0.073364	0.0350932	3.84806	ND		ND	0.0473888	0.0225209
Thr	0.323515	0.203219	0.407206	0.598635	0.612305	0.64359	2.45742	1.05942	0.448884	0.518323	0.724997	0.645976
Ala/Pro	4.95362	3.19258	3.08904	2.08022	2.36697	3.04704	3.55403	3.09789	3.48619	4.00825	3.55477	2.83993
Tyr	0.0730983	0.0111837	0.102697	0.00335817	0.243977	0.183437	0.233721	0.24842	0.391883	0.163101	0.317398	ND
Val	0.30939	0.188127	0.502098	0.0238539	0.756821	0.229614	0.517294	0.287742	0.314592	0.307654	0.357252	0.291641
Met	0.624849	ND	0.0637934	ND	0.175343	0.209184		ND	ND	ND	0.210278	0.176388
Cys	0.123389	0.00661862	0.126828	0.00372326	0.175931	0.120463	0.126721	0.00136801	0.109631	0.0091201	0.343998	0.411534
Ile	0.110138	0.0556555	0.162145	ND	0.103548	0.0128144	0.208284	0.0852636	0.0232278	0.007722	0.122624	0.0800898
Leu	0.138005	0.0700902	0.0784288	0.0990854	0.0489917	0.0326013	0.243002	0.0951136	0.0175486	0.00738694	0.0237275	0.0134582
Phe	0.163577	0.095576	0.13583	0.124909	0.0535392	0.0354534	0.177854	0.0991284	0.135333	0.0979332	0.121026	0.0629438
Orn	ND	ND	ND	ND	0.73777	ND	ND	ND	ND	ND	ND	ND
Trp	2.06899	ND	0.00929236	ND	0.399943	0.519288	0.0377603	ND	ND	ND	0.0178043	ND
Lys	0.239149	0.14649	0.151845	0.0803238	0.142763	0.0965817	0.306435	0.0688368	0.119039	0.064017	0.261152	0.192427
