# Supplementary material for: Peach Fruit Development: A Comparative Proteomic Study Between Endocarp and Mesocarp at Very Early Stages Underpins the Main Differential Biochemical Processes Between These Tissues
Source: Front Plant Sci. 2019 Jun 4;10:715. doi: 10.3389/fpls.2019.00715 (PMC6558166; doi:10.3389/fpls.2019.00715)
Supplement: Supplementary file 14 [file Table_5.xlsx]

## Sheet: 1
Supplementary Table 5 . Enzymes involved in Asparagine metabolism. Proteins highlighted in bold were found in proteomic analysis (Supplementary Table 2)
Prunus persica genome sequence acc nº	Alternative Transcripts (nº)	Access	Unitprot acc nº
Asparagine synthetase
Prupe.6G186800	3	ppa015268	A0A251NSG8	A0A251NSE3	A0A251NV37
Prupe.6G054800	2	ppa003265	M5W639	A0A251NKQ9
Prupe.4G044100	1	ppa010287	M5WII8
Prupe.4G045300	1	ppa009777	A0A251PFR8	M5WI96
Prupe.4G185400	1	ppa010307	M5WHA9
Prupe.1G288300	4	ppa023466	M5XIE1	A0A251R4S2	A0A251R4Q4	A0A251R5P9
3-cyanoalanine hydratase
Prupe.6G137600	1	ppa008090	M5VYZ3
3-cyanoalanine nitrilase
Prupe.7G100200	1	ppa024268	M5WFU8	A0A251N9I7
β-Cyano-Alanine-synthase
Prupe.2G172800	1	ppa007292	M5X090
Asparaginase
Prupe.2G004200	6	ppa007942	M5X0H8	A0A251Q8R2	A0A251Q8X1	A0A251Q8Y5	A0A251Q8U8	A0A251QC47
Prupe.1G430400	5	ppa008583	M5XEH2	A0A251RC15	A0A251RBX9
Prupe.2G162500	6	ppa006346	A0A251QGL7	M5XCP2	A0A251QGM8	A0A251QGP0	A0A251QGQ3
Prupe.5G209700	1	ppa008761	M5WUV5
Prupe.2G255000	1	ppa003363	M5XF53
Prupe.2G273700	3	ppa007409	M5XCW7	A0A251QMP0	A0A251QME5
Prupe.4G164900	1	ppa003073	M5X0K4
Prupe.5G209200	3	ppa016260	M5WDN9	A0A251PBK7	A0A251PBI8
Prupe.8G034000	1	ppa015895	M5VY21
Glutamine synthetase
Prupe.7G124800	2	ppa001481	A0A251NCP2	A0A251NAM1	M5W5A0
Prupe.5G236300	1	ppa007728	M5W9R8
Prupe.1G346600	1	ppa007771	M5XW19
Prupe.3G166500	3	ppa007772	M5WSY2	A0A251Q169	A0A251Q2B9
Prupe.1G148700	1	ppa006025	M5XPX4
Glutamate DH
Prupe.2G269800	1	ppa006442	M5X1C9
Prupe.5G056900	4	ppa006458	A0A251P496	M5WMA0	M5W9I9
Prupe.7G004100	5	ppa006457	M5VQ31
Prupe.3G052600	2	ppa002737	A0A251PVW9	A0A251PVQ5	M5WQI3
Glutaminase
Prupe.6G100100	1	ppa010384	M5VZR9
Asparagine aminotransferase
Prupe.4G258800	4	ppa006653	M5WVV0
